# Supplementary material
Source: MDPI journal article supplement (https://www.mdpi.com/2073-4441/15/17/3057)
Supplement: s1 [file s1]

## Supplementary Materials

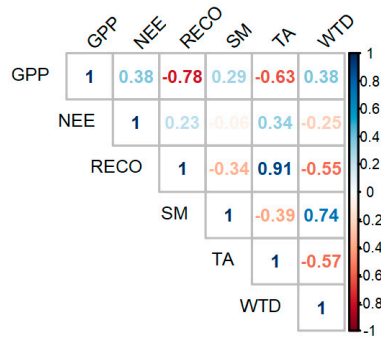

(a)

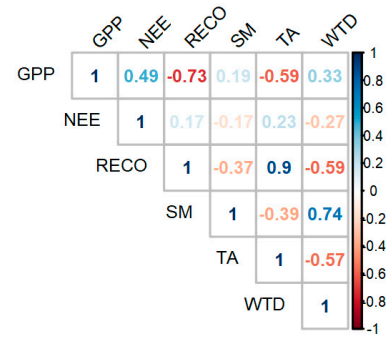

(b)

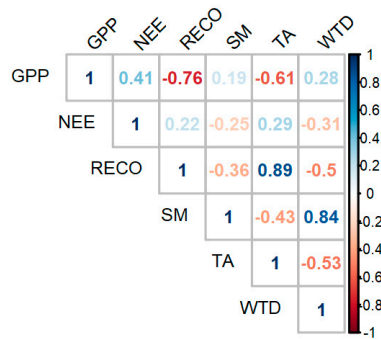

(c)

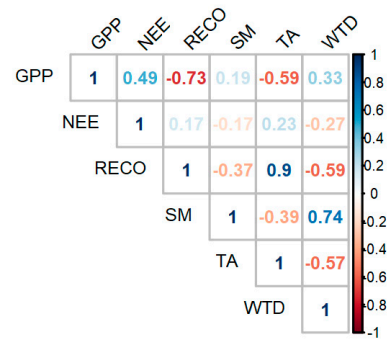

(d)

**Figure S1.** Spearman correlation matrix for daily values of GPP, Reco, NEE, soil moisture (SM), air temperature (TA) and water table depth (WTD) in 2021 for individual measurement plots: (a) HWL; (b) HWL\_Si; (c) LWL; (d) LWL\_Si.

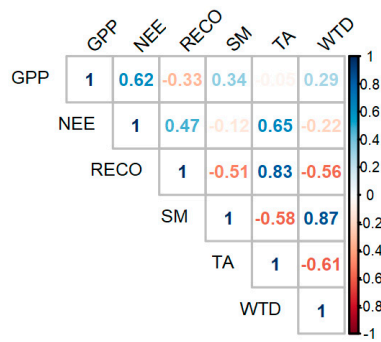

(a)

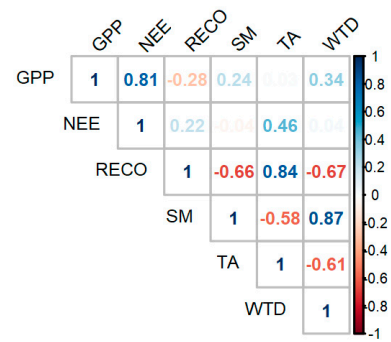

(b)

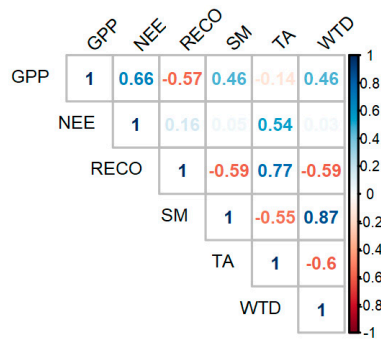

(c)

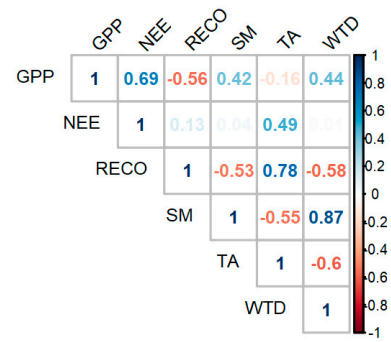

(d)

**Figure S2.** Spearman correlation matrix for daily values for daily values of GPP, Reco, NEE, soil moisture (SM), air temperature (TA) and water table depth (WTD) in 2022 for individual measurement plots: (a) HWL; (b) HWL\_Si; (c) LWL; (d) LWL\_Si.
